# Supplementary material for: Nanorod-like α-Bi2O3: a highly active photocatalyst synthesized using g-C3N4 as a template
Source: Royal Society of Chemistry journal article supplement (doi:10.1039/c4ra08541h), 2014-01-01
Supplement: c4ra08541h1.pdf [file c4ra08541h1.pdf]

Supporting information

**Nanorod-like  $\alpha$ -Bi<sub>2</sub>O<sub>3</sub> nanoparticles: a highly active photocatalyst synthesized by using g-C<sub>3</sub>N<sub>4</sub> as a template**

Hai-Ying Jiang<sup>a, b</sup>, Guigao Liu<sup>a</sup>, Peng Li<sup>a</sup>, Dong Hao<sup>a</sup>, Xianguang Meng<sup>a</sup>, Tao Wang<sup>a</sup>,  
Jun Lin<sup>b, \*</sup>, Jinhua Ye<sup>a, \*</sup>

<sup>a</sup> Research Unit for Environmental Remediation Materials, National Institute for Materials Science (NIMS), 1-1, Namiki, Tsukuba, Ibaraki 305-0044, Japan

<sup>b</sup> Department of Chemistry, Renmin University of China, Beijing 100872, People's Republic of China

To whom correspondence should be addressed. E-mail: Jinhua.YE@nims.go.jp

## 1 Sample Characterization:

2 The microstructures of the samples were observed by field emission microscope (FESEM, JEOL 6701F). Transmission electron  
3 microscopy images were recorded with a field emission transmission electron microscope (2100F, JEOL Co., Japan). A surface-area  
4 analyzer (BEL Sorp-mini II, BEL Japan Co., Japan) was used to measure the surface areas of samples through nitrogen adsorption and  
5 desorption isotherms at 77K. The crystal structures of the samples were determined with an X-ray diffractometer (X'pert Powder,  
6 PANalytical B. V., Netherlands) with Cu-K $\alpha$  radiation. Fourier transform infrared (FT-IR) spectra were obtained with an IRPrestige-21  
7 FTIR (Shimadzu) spectrophotometer. The optical properties of the samples were measured by UV-vis diffuse reflectance spectroscopy  
8 method by using UV-2600 (Shimadzu Co., Japan) spectrophotometer equipped, with BaSO<sub>4</sub> as the reflectance standard, and the optical  
9 absorptions were converted from the reflection spectra according to Kubelka-Munk equation. Thermogravimetric-differential thermal  
10 analysis (TG-DTA; Shimadzu, DTG-60H, Japan) was used to study the formation mechanism of the nanorod-like  $\alpha$ -Bi<sub>2</sub>O<sub>3</sub>.

11

12

## 13 Photocatalytic activity measurements:

14 The photocatalytic oxidations of gaseous IPA were carried out under the visible light with the wavelengths of  $420\text{ nm} \leq \lambda \leq 800\text{ nm}$ . The  
15 light source was a 300 W Xe-arc lamp (10A imported current, focused through a 50×50mm shutter window) equipped with some  
16 wavelength cutoff filters and a water filter. Typically, 100 mg photocatalyst was bespread uniformly on a glass dish with an area of 9 cm<sup>2</sup>.  
17 A certain amount (~1400 ppm) of gaseous IPA was injected into the vessel and kept for 2 h in the dark before irradiation. During the  
18 irradiation by visible light, 0.5 ml of the gas was sampled everyone 1 h intervals. The products were analyzed with a gas chromatograph  
19 (GC-2014, Shimadzu, Japan) with a flame ionization detector (FID).

20

21

22

23

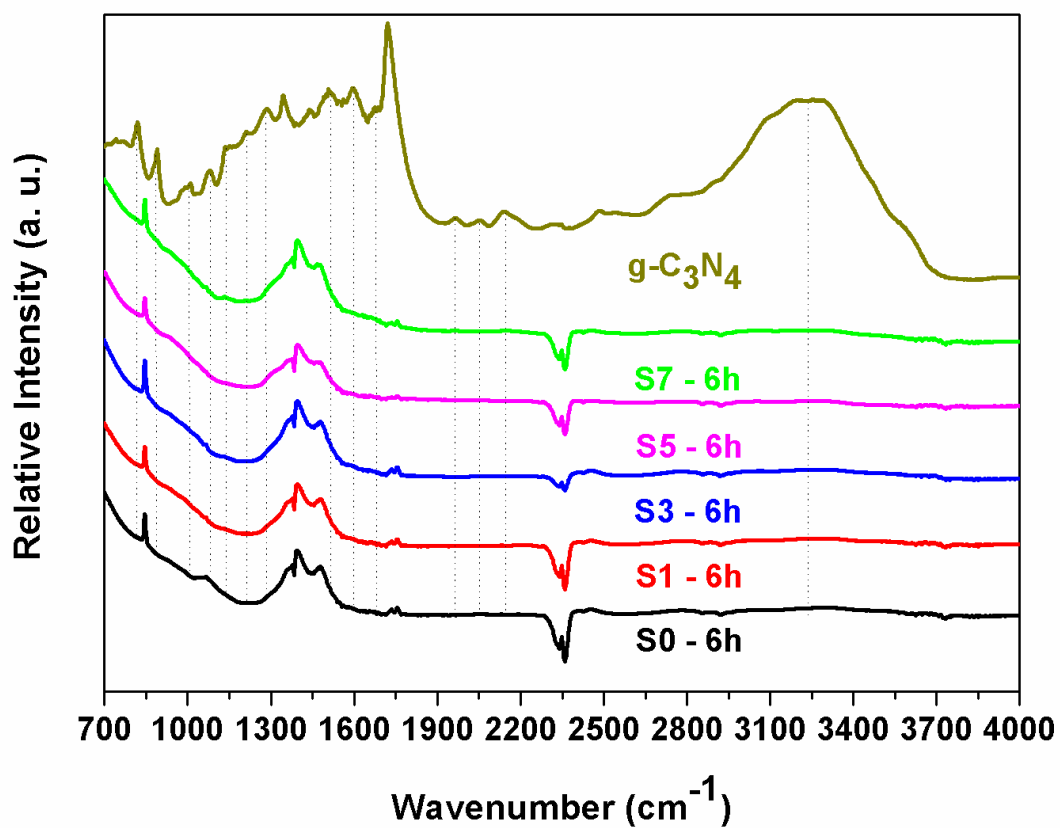

**Figure S 1** The FT-IR spectra of all the  $\alpha$ -Bi<sub>2</sub>O<sub>3</sub> samples induced by g-C<sub>3</sub>N<sub>4</sub> with 6 hours' calcinations

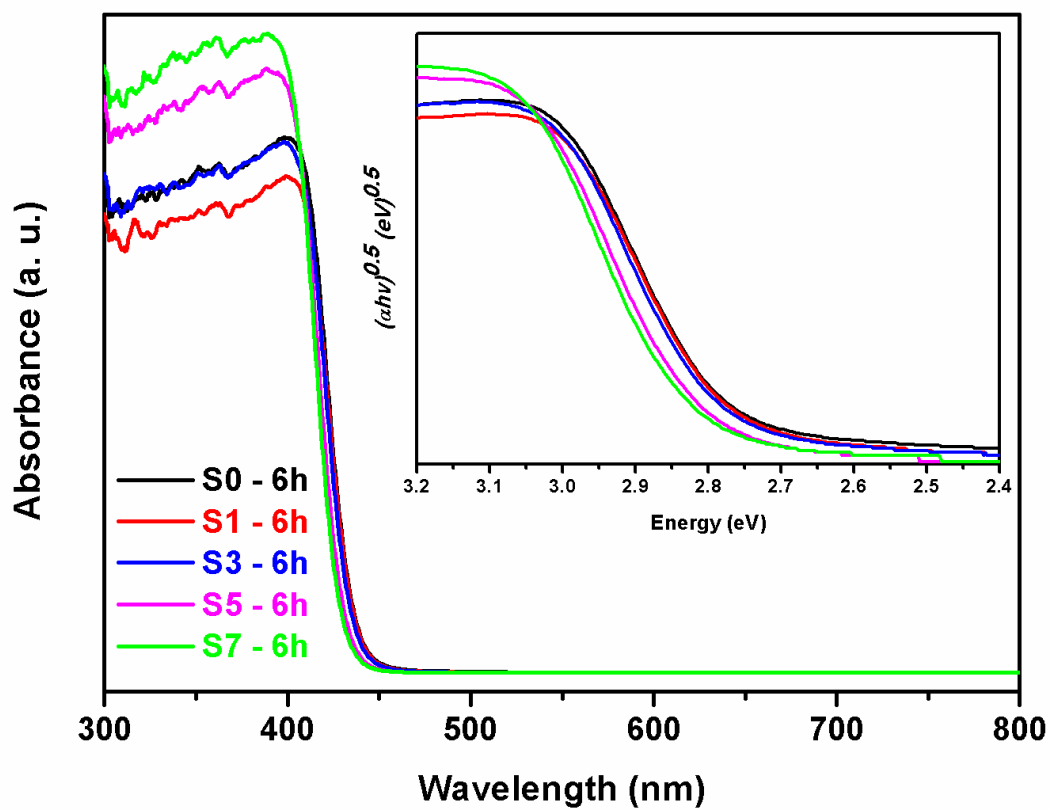

**Figure S 2** The UV-vis DRS spectra of all the  $\alpha$ - $\text{Bi}_2\text{O}_3$  samples induced by  $\text{g-C}_3\text{N}_4$  with 6 hours' calcinations

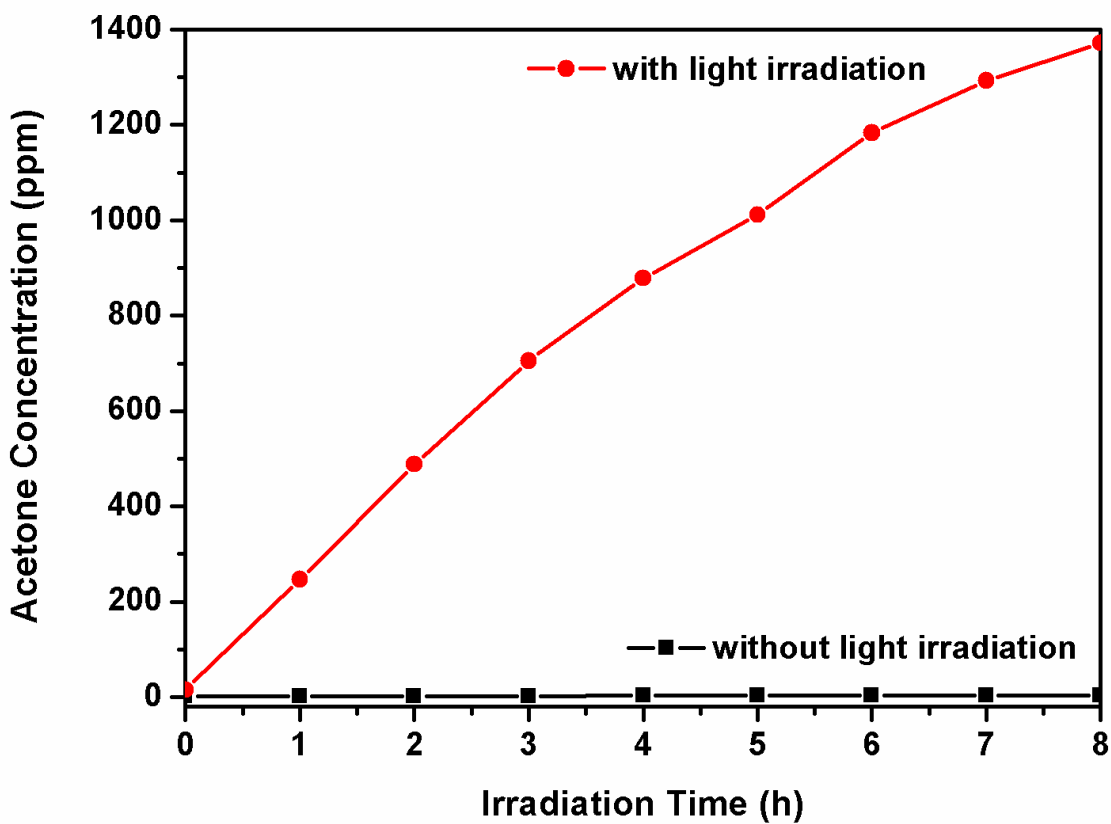

1  
2 **Figure S 3** Photocatalytic oxidations of gaseous IPA over S7 - 6h with and without visible light irradiation.

1  
2  
3

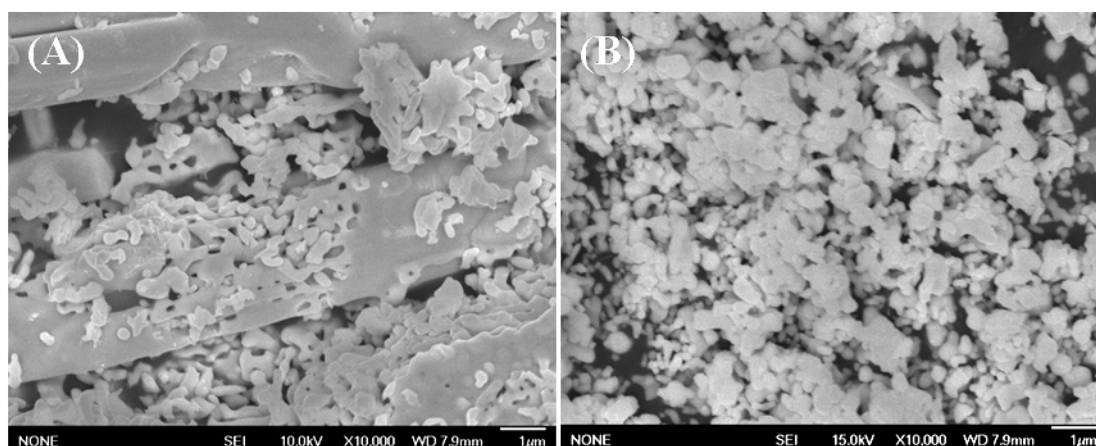

4  
5 **Figure S 4** The SEM spectra of the  $\alpha$  -  $\text{Bi}_2\text{O}_3$  by using the  $(\text{NH}_4)_2\text{CO}_3$  [inorganics (A)] and citric acid [organics (B)] as the template to treat  
6 the microrod-like  $\alpha$ - $\text{Bi}_2\text{O}_3$
